# Supplementary material for: PCSK9 Activity Is Potentiated Through HDL Binding
Source: PubMed Central journal article supplement (PMC8579991; doi:10.1161/circresaha.121.319272), 2021-10-04

Figure 4B

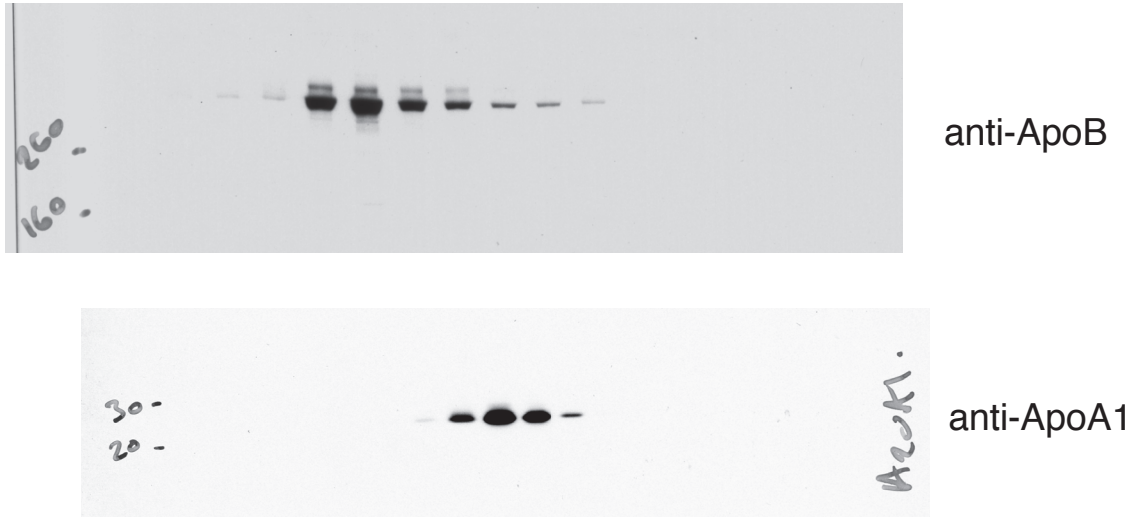

Figure 4C

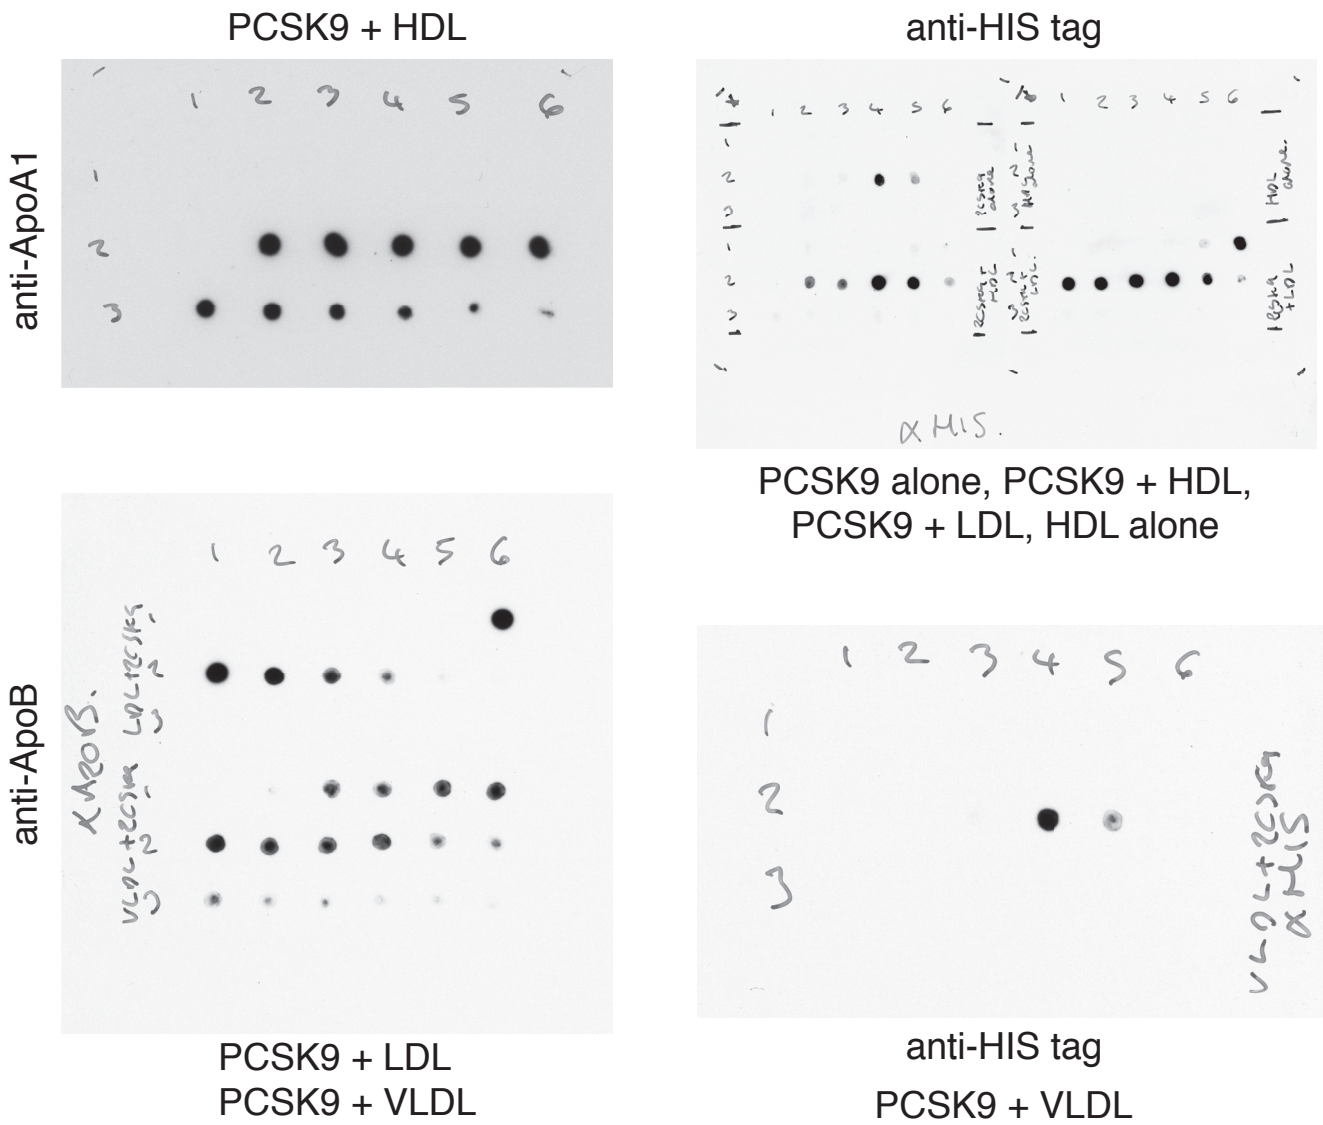

Figure 4D

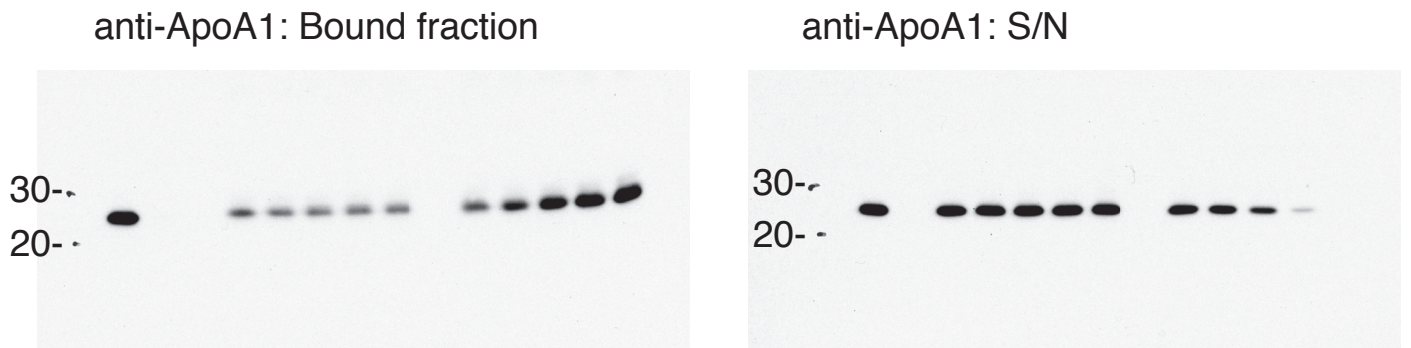

Figure 4F

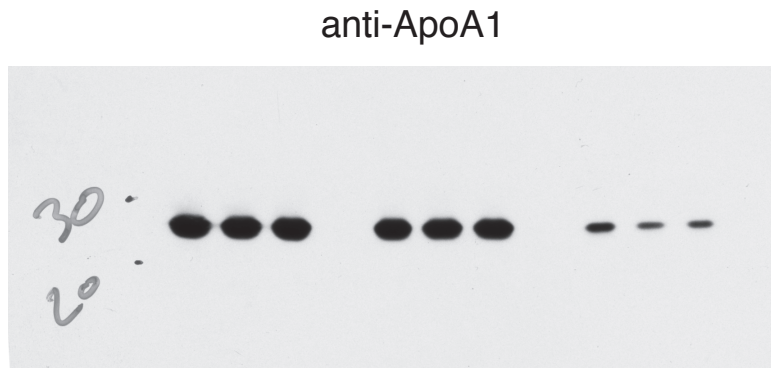

Figure 6B

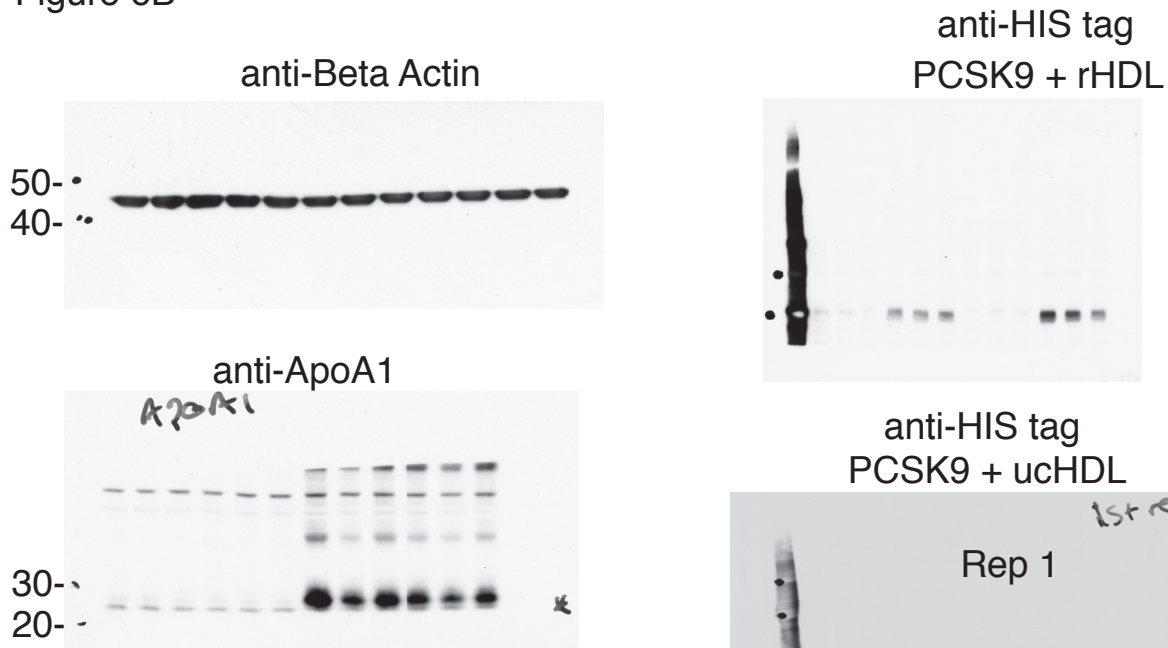

Figure 6D

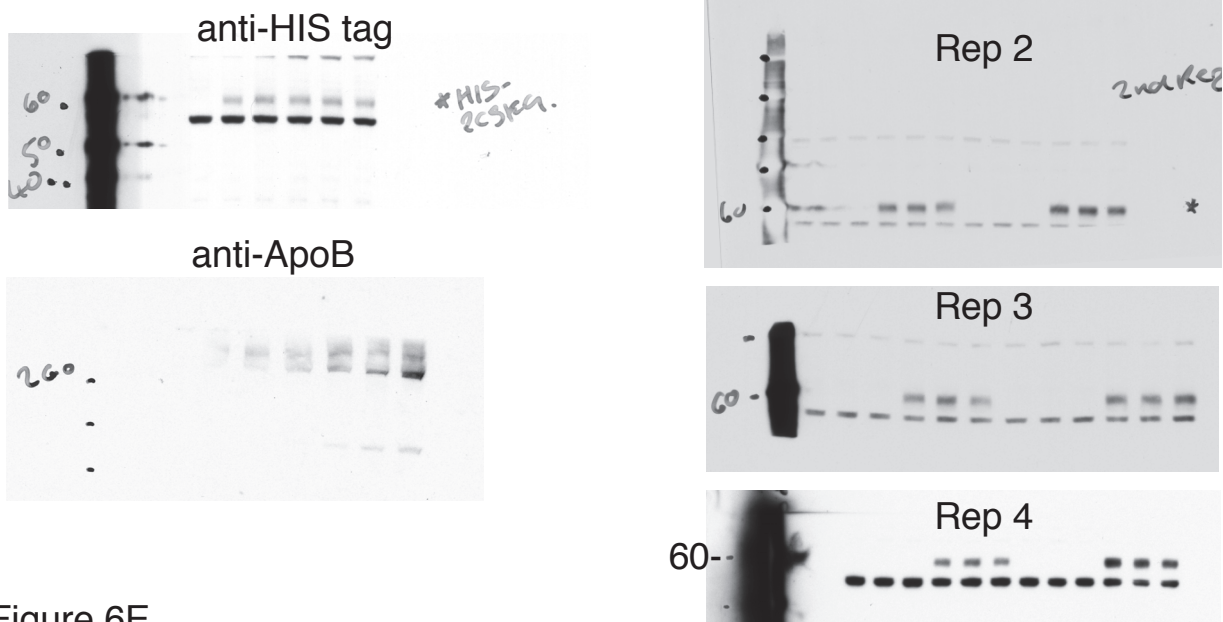

Figure 6E

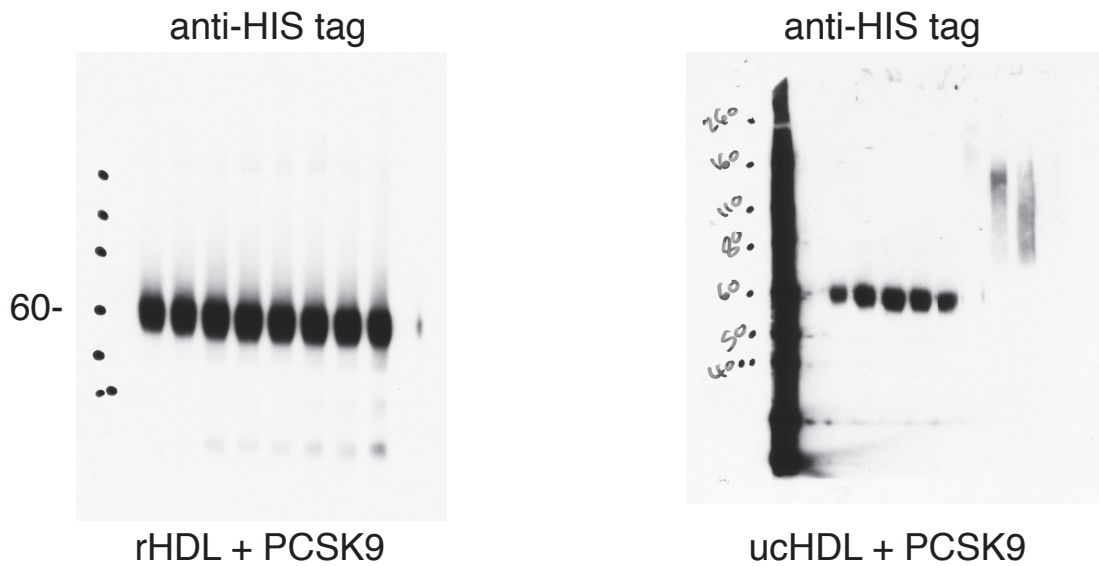

Figure 7A

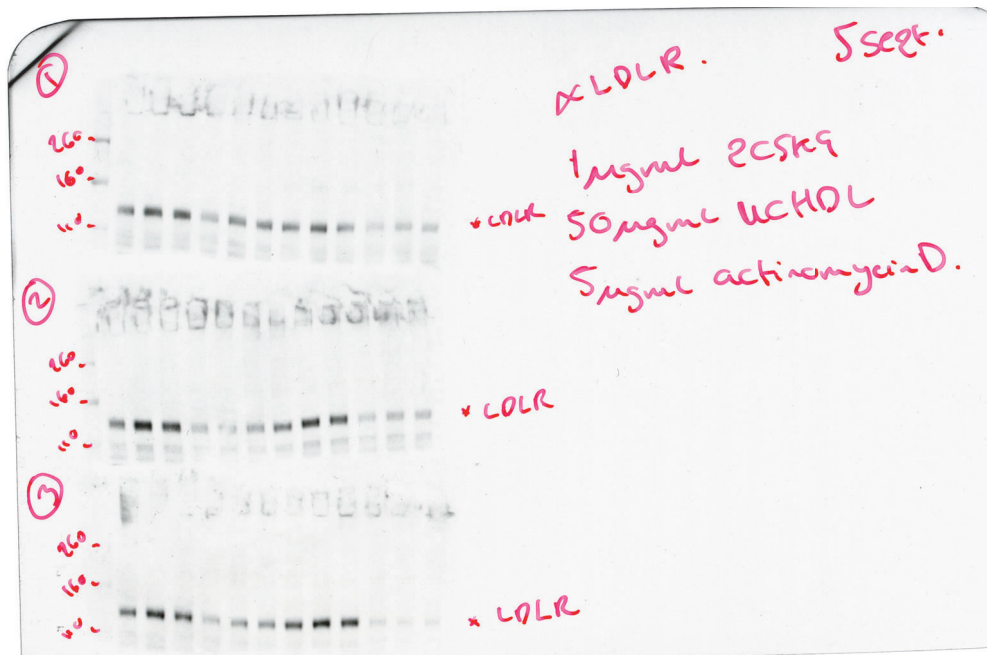

anti-LDLR  
3 reps

anti-PCSK9 multimer quantification

Rep 1

Rep 2

Rep 3

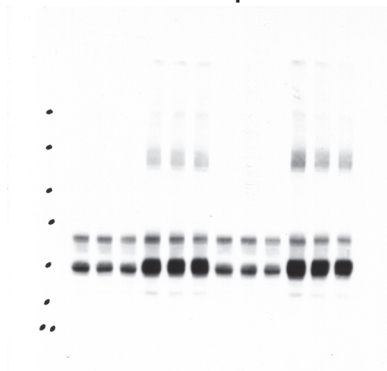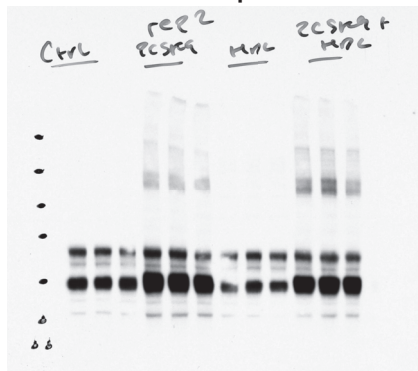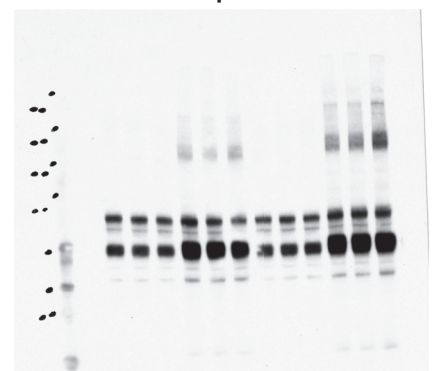

anti-HIS tag

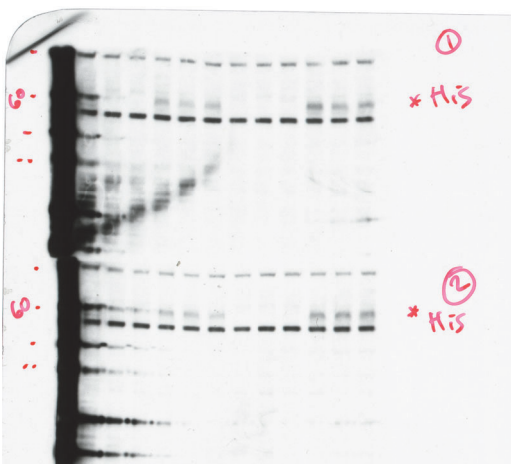

Rep 1

Rep 2

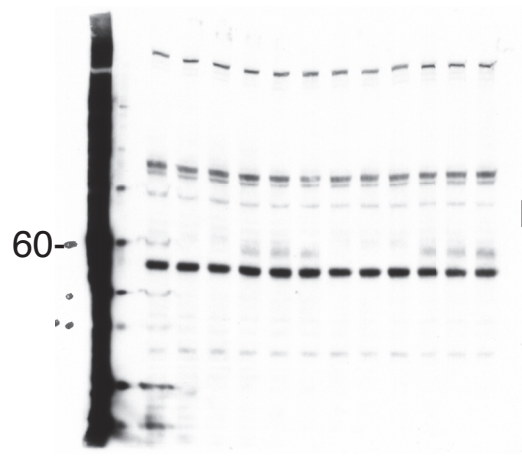

Rep 3

Figure 7A continued

anti-ApoA1

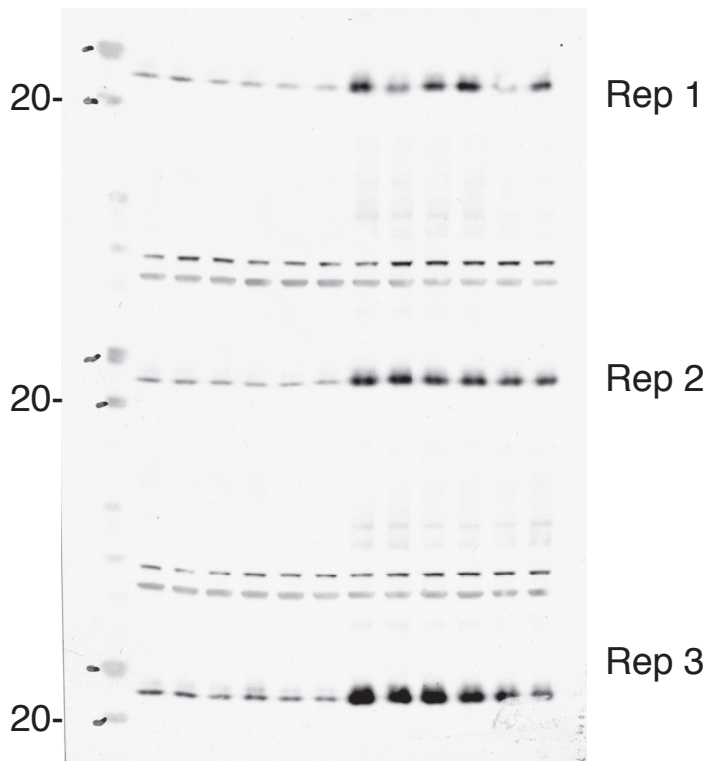

anti-Beta actin

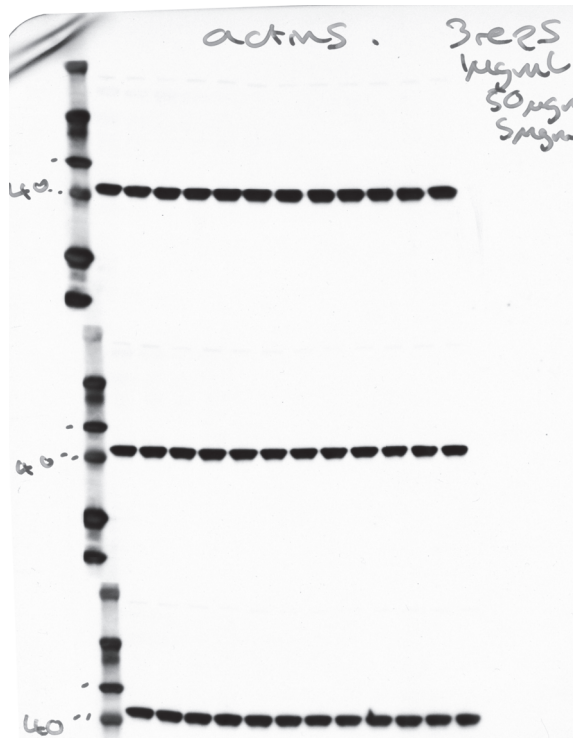

Figure 7C

anti-LDLR

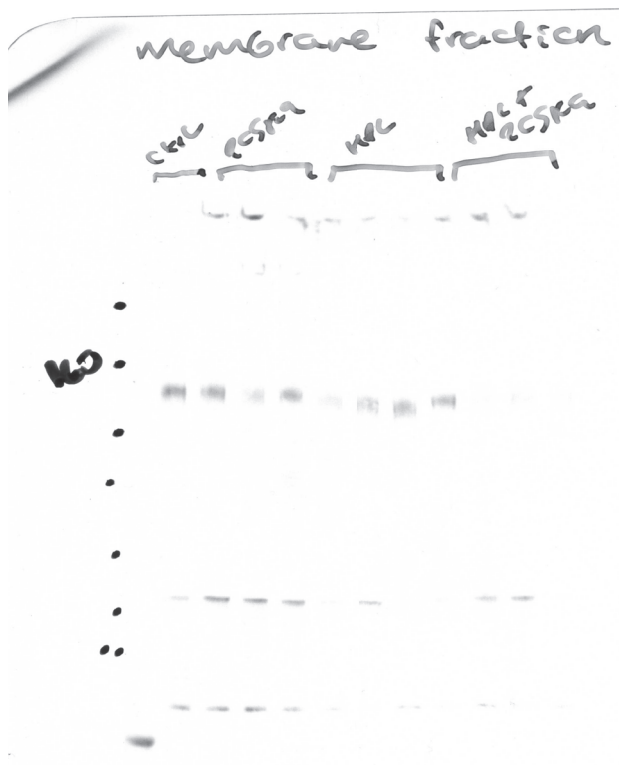

anti-TfR

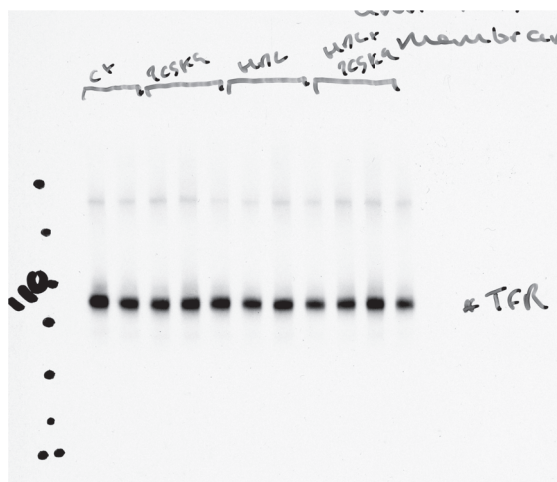

Online Figure V

anti-ApoA1: PCSK9 + ucHDL

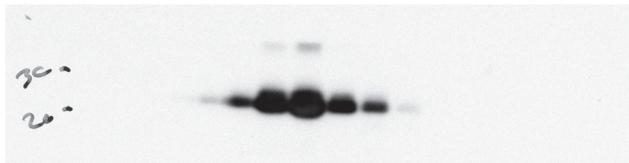

anti-PCSK9: PCSK9 alone

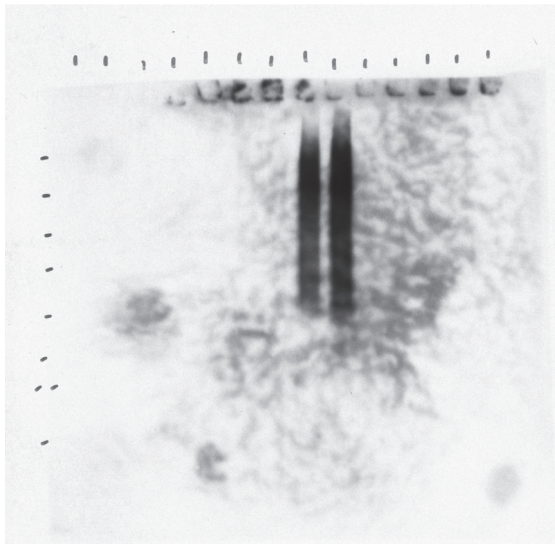

anti-PCSK9: PCSK9 + ucHDL

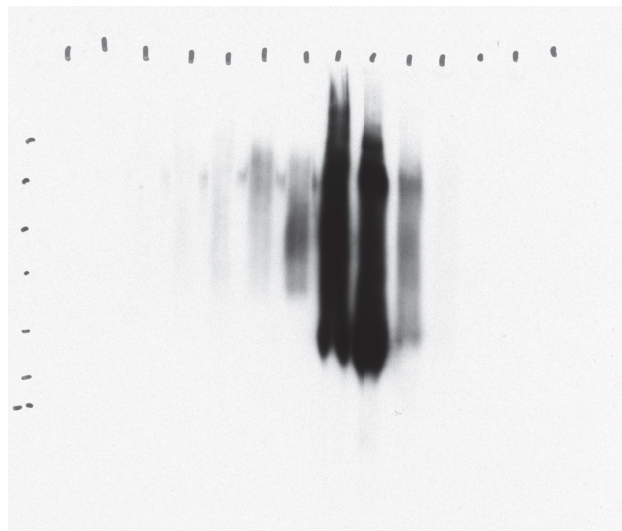

Online Figure XII

anti-PCSK9: PCSK9 + increasing ucHDL

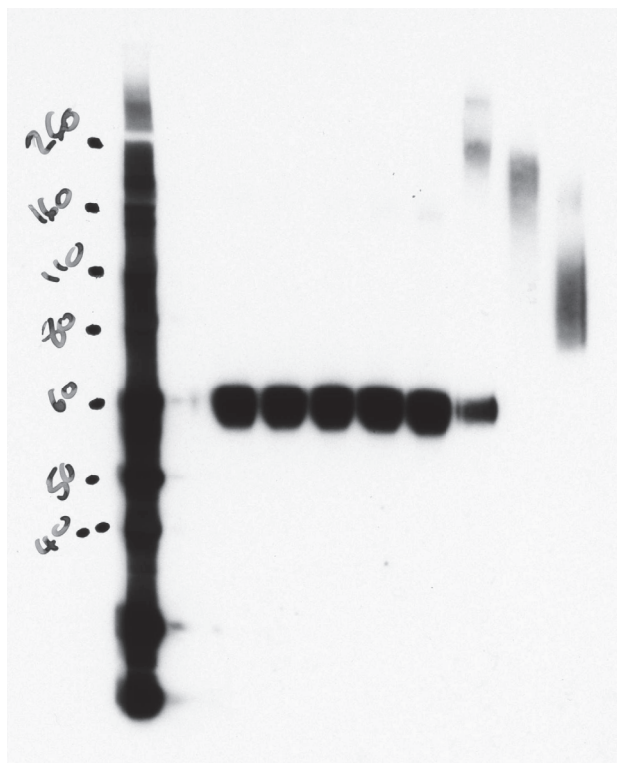

anti-PCSK9:  
PCSK9 + increasing ucLDL

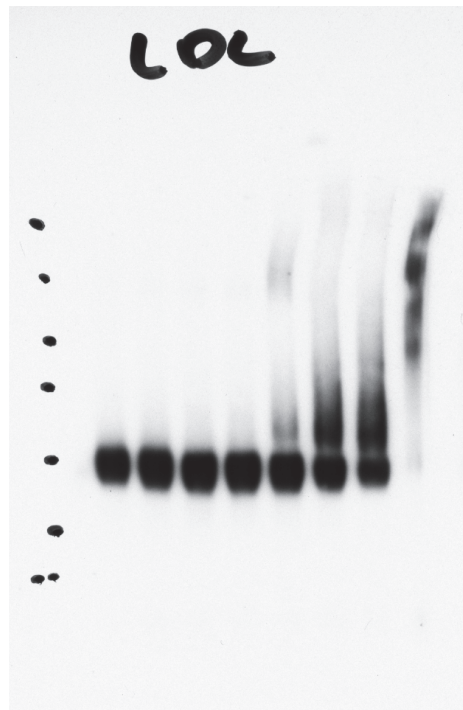

Online Figure XIII

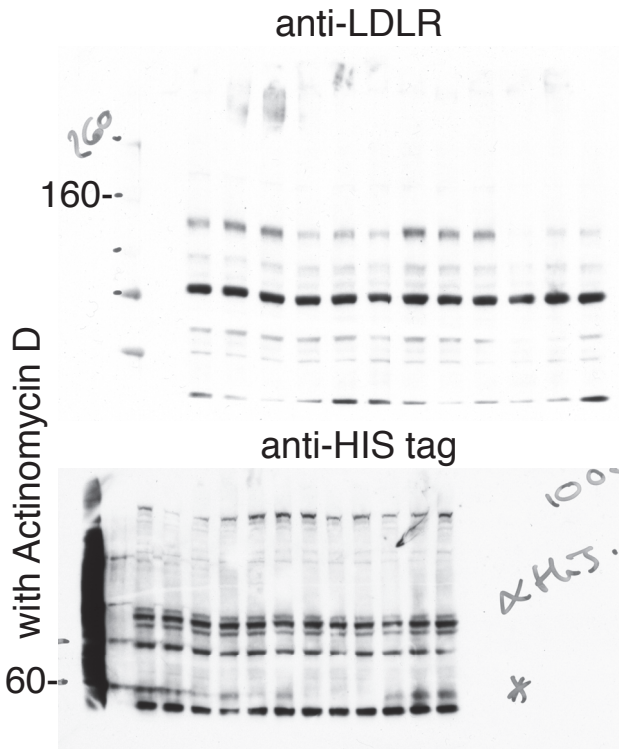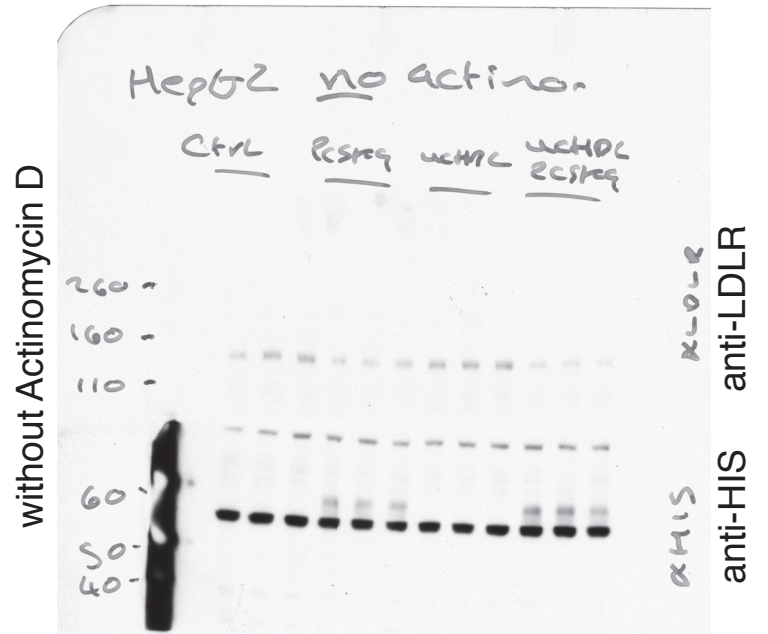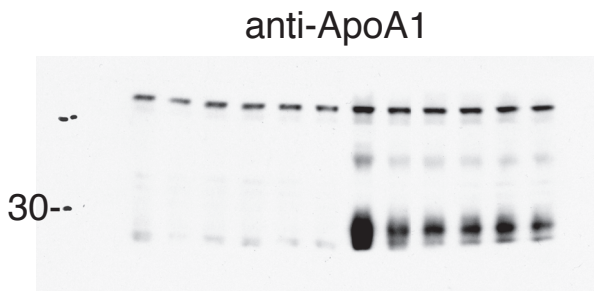

Online Figure XIV- without Actinomycin D

anti-LDLR: PCSK9 dose

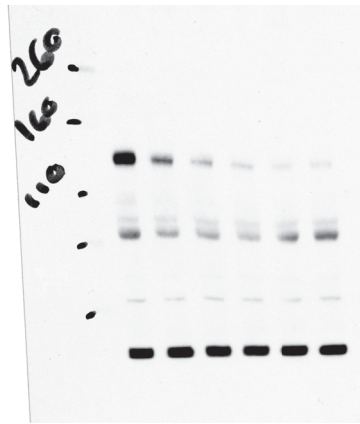

anti-PCSK9: PCSK9 dose

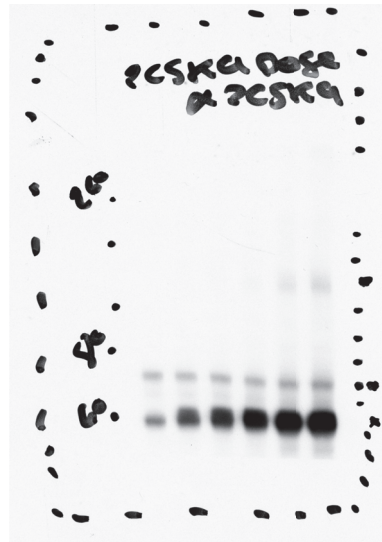

anti-LDLR: rHDL dose

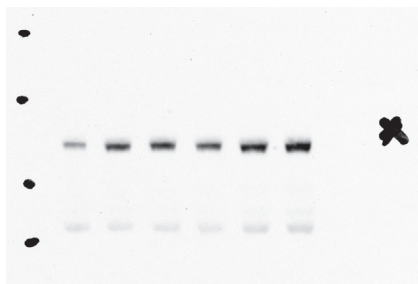

anti-ApoA1: rHDL dose

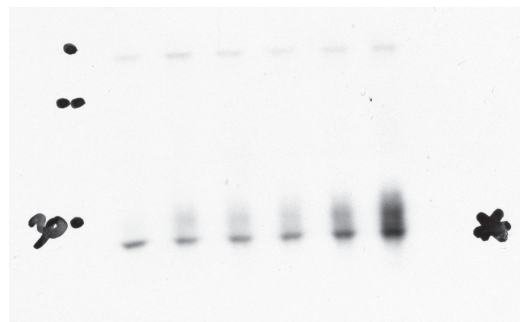

anti-LDLR: ucHDL dose

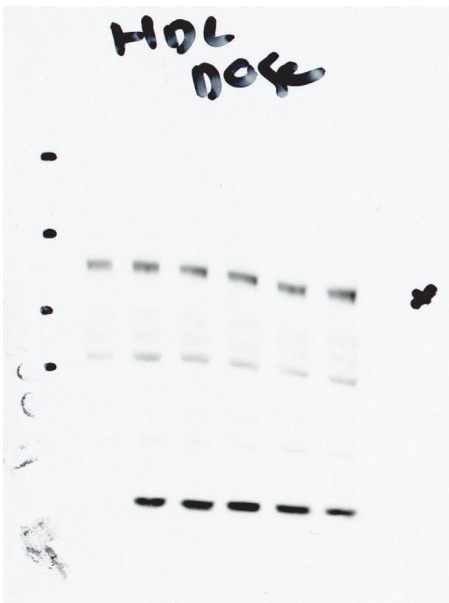

anti-ApoA1: ucHDL dose

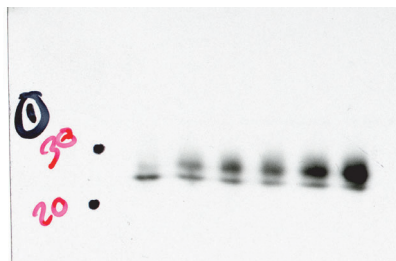

anti-Beta actin: ucHDL dose

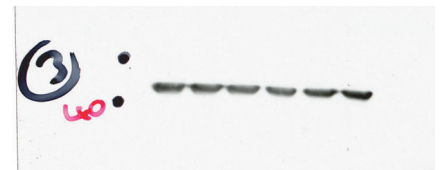



Online Figure XIV- with Actinomycin D

anti-HIS tag: PCSK9 dose

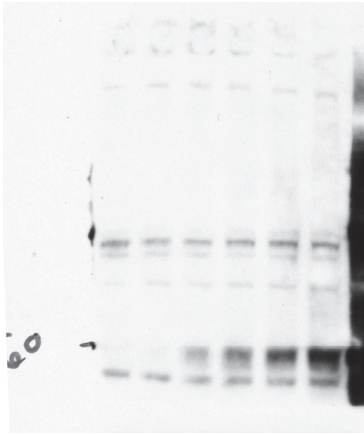

anti-LDLR: PCSK9 dose

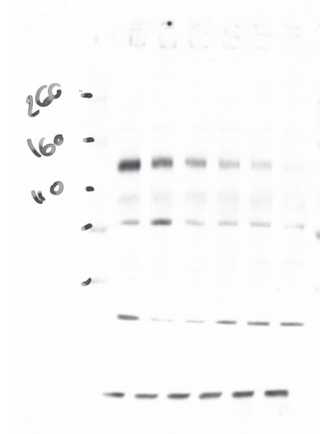

anti-Beta actin:  
PCSK9 dose

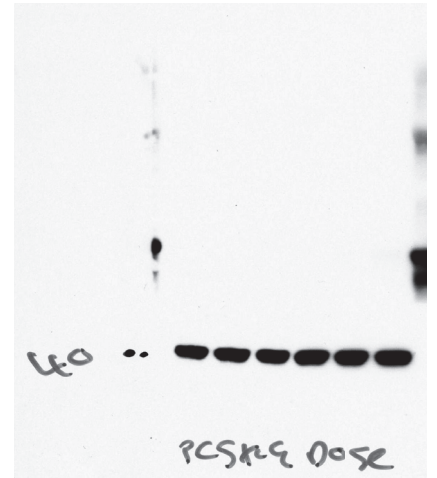

anti-ApoA1: rHDL dose

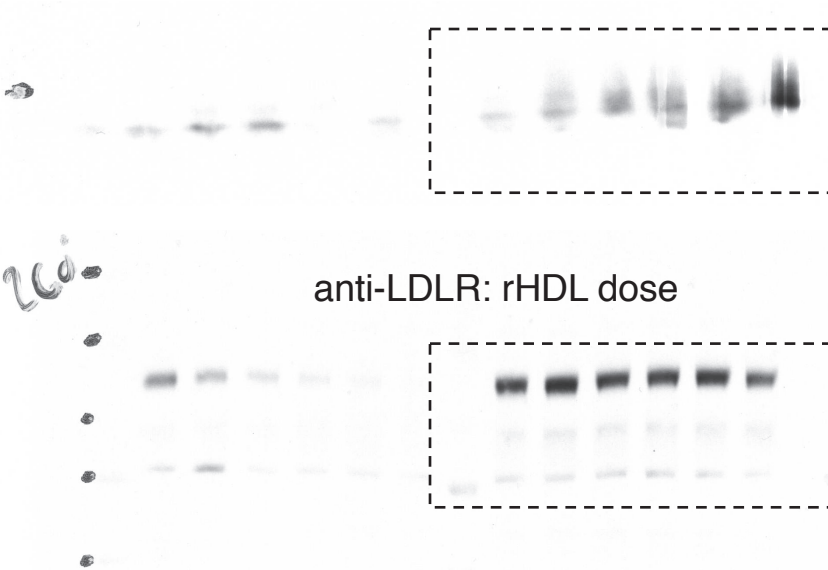

anti-LDLR: rHDL dose

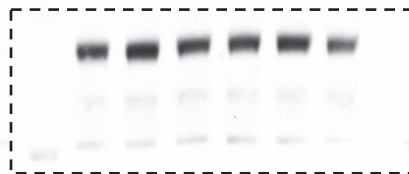

anti-Beta actin:  
rHDL dose

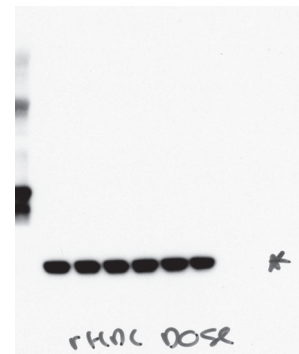

anti-LDLR: ucHDL dose

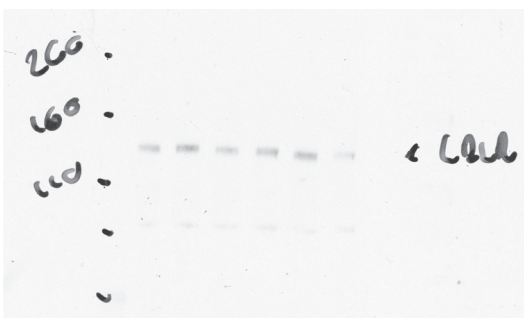

anti-ApoA1: ucHDL dose

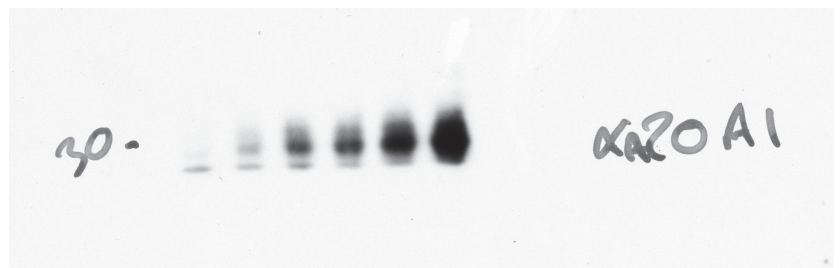

anti-Beta actin: ucHDL dose

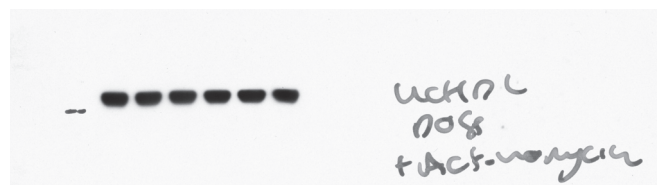

Supplement: res-129-1039-s004.pdf [file res-129-1039-s004.pdf]
