# Supplementary material for: PCSK9 Activity Is Potentiated Through HDL Binding
Source: PubMed Central journal article supplement (PMC8579991; doi:10.1161/circresaha.121.319272), 2021-10-04
Supplement: res-129-1039-s005.pdf [file res-129-1039-s005.pdf]

## Major Resources Table

In order to allow validation and replication of experiments, all essential research materials listed in the Methods should be included in the Major Resources Table below. Authors are encouraged to use public repositories for protocols, data, code, and other materials and provide persistent identifiers and/or links to repositories when available. Authors may add or delete rows as needed.

### Animals (in vivo studies)

| Species | Vendor or Source | Background Strain | Sex | Persistent ID / URL |
|---------|------------------|-------------------|-----|---------------------|
|         |                  |                   |     |                     |
|         |                  |                   |     |                     |
|         |                  |                   |     |                     |

### Genetically Modified Animals

| Species         | Vendor or Source | Background Strain | Other Information | Persistent ID / URL |
|-----------------|------------------|-------------------|-------------------|---------------------|
| Parent - Male   |                  |                   |                   |                     |
| Parent - Female |                  |                   |                   |                     |

### Antibodies

| Target antigen              | Vendor or Source    | Catalog #   | Working concentration | Lot # (preferred but not required) | Persistent ID / URL                                                                                                                                                                                                                                                                                     |
|-----------------------------|---------------------|-------------|-----------------------|------------------------------------|---------------------------------------------------------------------------------------------------------------------------------------------------------------------------------------------------------------------------------------------------------------------------------------------------------|
| PCSK9                       | Abcam               | ab181142    | 1:1000                |                                    | <a href="https://www.abcam.com/pcsk9-antibody-epr76272-ab181142.html">https://www.abcam.com/pcsk9-antibody-epr76272-ab181142.html</a>                                                                                                                                                                   |
| ApoA1-sepharose conjugation | Acedemy Bio-Medical | 11A-G2b     |                       |                                    | <a href="https://www.academybiomed.com/collections/antibody/products/a03-goat-anti-human-apolipoprotein-ai-polyclonal-antibody?variant=22226734186575">https://www.academybiomed.com/collections/antibody/products/a03-goat-anti-human-apolipoprotein-ai-polyclonal-antibody?variant=22226734186575</a> |
| ApoA1                       | Abcam               | Ab52945     | 1:1000                |                                    | <a href="https://www.abcam.com/apolipoprotein-a-i-antibody-ep1368y-ab52945.html">https://www.abcam.com/apolipoprotein-a-i-antibody-ep1368y-ab52945.html</a>                                                                                                                                             |
| ApoB                        | Mouse               | MIA1609     | 1:1000                |                                    | <a href="https://www.thermofisher.com/antibody/MIA1609">https://www.thermofisher.com/antibody/MIA1609</a>                                                                                                                                                                                               |
| LDLR                        | Rabbit              | ab52818     | 1:1000                |                                    | <a href="https://www.abcam.com/ldl-receptor-antibody-ep1553y-ab52818.html">https://www.abcam.com/ldl-receptor-antibody-ep1553y-ab52818.html</a>                                                                                                                                                         |
| Transferrin                 | Mouse               | ab269513    | 1:1000                |                                    | <a href="https://www.abcam.com/transferrin-receptor-antibody-h684-ab269513.html">https://www.abcam.com/transferrin-receptor-antibody-h684-ab269513.html</a>                                                                                                                                             |
| 6x His tag                  | Mouse               | ab18184     | 1:1000                |                                    | <a href="https://www.abcam.com/6x-his-tag-antibody-hish8-ab18184.html">https://www.abcam.com/6x-his-tag-antibody-hish8-ab18184.html</a>                                                                                                                                                                 |
| $\beta$ -Actin              | Mouse               | A1978       | 1:10000               |                                    | <a href="https://www.sigmaaldrich.com/GB/en/product/sigma/a1978">https://www.sigmaaldrich.com/GB/en/product/sigma/a1978</a>                                                                                                                                                                             |
| HRP-anti-Rabbit             | Mouse               | 211-032-171 | 1:5000                |                                    | <a href="https://www.jacksonimmuno.com/catalog/products/211-032-171">https://www.jacksonimmuno.com/catalog/products/211-032-171</a>                                                                                                                                                                     |
| HRP-anti-Mouse              | Goat                | 115-035-174 | 1:5000                |                                    | <a href="https://www.jacksonimmuno.com/catalog/products/115-035-174">https://www.jacksonimmuno.com/catalog/products/115-035-174</a>                                                                                                                                                                     |

### DNA/cDNA Clones

| Clone Name | Sequence | Source / Repository | Persistent ID / URL |
|------------|----------|---------------------|---------------------|
|            |          |                     |                     |
|            |          |                     |                     |
|            |          |                     |                     |

### Cultured Cells

| Name              | Vendor or | Sex (F, M, or | Persistent ID / URL |
|-------------------|-----------|---------------|---------------------|
| DOI [to be added] |           |               |                     |

|       | Source                                                     | unknown) |                                                                                                                                                                                                                                                                     |
|-------|------------------------------------------------------------|----------|---------------------------------------------------------------------------------------------------------------------------------------------------------------------------------------------------------------------------------------------------------------------|
| HepG2 | European Collection of Authenticated Cell Cultures (ECACC) | Male     | <a href="https://www.phe-culturecollections.org.uk/products/celllines/generalcell/detail.jsp?refId=85011430&amp;collection=ecacc_gc">https://www.phe-culturecollections.org.uk/products/celllines/generalcell/detail.jsp?refId=85011430&amp;collection=ecacc_gc</a> |

#### Data & Code Availability

| Description | Source / Repository | Persistent ID / URL |
|-------------|---------------------|---------------------|
|             |                     |                     |
|             |                     |                     |
|             |                     |                     |

#### Other

| Description                                     | Source / Repository | Persistent ID / URL                                                                                                                                                                                                                                                                                                         |
|-------------------------------------------------|---------------------|-----------------------------------------------------------------------------------------------------------------------------------------------------------------------------------------------------------------------------------------------------------------------------------------------------------------------------|
| Human PCSK9 ELISA Duoset Kit                    | R&D                 | <a href="https://www.rndsystems.com/products/human-proprotein-convertase-9-pcsk9-duoset-elisa_dy3888">https://www.rndsystems.com/products/human-proprotein-convertase-9-pcsk9-duoset-elisa_dy3888</a>                                                                                                                       |
| AbsoluteIDQ® p400 HR kit                        | Biocrates           | <a href="https://biocrates.com/absoluteidq-p400-hr-kit/">https://biocrates.com/absoluteidq-p400-hr-kit/</a>                                                                                                                                                                                                                 |
| High Density Lipoprotein (HDL) Depletion Column | Genway Biotech      | <a href="https://www.genwaybio.com/affinity-purified-anti-human-high-density-lipoprotein-hdl-igy-gel-kit">https://www.genwaybio.com/affinity-purified-anti-human-high-density-lipoprotein-hdl-igy-gel-kit</a>                                                                                                               |
| Superose™ 6 Increase 10/300 GL column           | Cytiva              | <a href="https://www.cytivalifesciences.com/en/us/support/products/superose-6-10-300-gl-17517201#:~:text=Superose%20%2010%2F300%20GL,5000%20to%205%20000%20000.">https://www.cytivalifesciences.com/en/us/support/products/superose-6-10-300-gl-17517201#:~:text=Superose%20%2010%2F300%20GL,5000%20to%205%20000%20000.</a> |
| TSKgel G5000/G4000PWXL                          | Tosoh Bioscience    | <a href="https://www.separations.eu.tosohbioscience.com/solutions/hplc-products/size-exclusion/aqueous-size-exclusion-gfc/tskgel-pwxi-columns/tskgel-g4000pwxi">https://www.separations.eu.tosohbioscience.com/solutions/hplc-products/size-exclusion/aqueous-size-exclusion-gfc/tskgel-pwxi-columns/tskgel-g4000pwxi</a>   |
